# Supplementary material for: Vanadium(iii) phenoxyimine complexes for ethylene or ε-caprolactone polymerization: mononuclear versus binuclear pre-catalysts
Source: Royal Society of Chemistry journal article supplement (doi:10.1039/c2cy20571h), 2012-09-04
Supplement: c2cy20571h.pdf [file c2cy20571h.pdf]

## Supporting Information

### Vanadium(III) phenoxyimine complexes for ethylene or $\epsilon$ -caprolactone polymerization: mononuclear *versus* binuclear pre-catalysts

Lucy Clowes,<sup>a</sup> Mark Walton,<sup>a</sup> Carl Redshaw,<sup>\*a</sup> Yimin Chao,<sup>a</sup> Alex Walton,<sup>b</sup> Pertti Elo,<sup>c</sup> Victor Sumerin<sup>c</sup> and David L. Hughes<sup>a</sup>

<sup>a</sup> School of Chemistry, University of East Anglia, Norwich, NR4 7TJ, UK. Tel: +44 (0) 1603-593137; E-mail: [carl.redshaw@uea.ac.uk](mailto:carl.redshaw@uea.ac.uk)

<sup>b</sup> School of Physics & Astronomy, University of Leeds, Leeds, LS2 9JT, UK.

<sup>c</sup> Borealis Polymers, P.O. Box 330, FI-06101, Porvoo, Finland

**Table S1** PPR - Homopolymerization of **S10** and **S12**<sup>a</sup>

| Run | Pre-Catalyst (mg)             | Metal Content ( $\mu\text{mol}$ ) <sup>b</sup> | Final Ethylene uptake (psi) |
|-----|-------------------------------|------------------------------------------------|-----------------------------|
| 1   | <b>S10</b> (0.3)              | 3.17E-03                                       | 5.04                        |
| 2   | <b>S10</b> (0.8)              | 8.44E-03                                       | 4.88                        |
| 3   | <b>S10</b> (0.8) <sup>c</sup> | 8.44E-03                                       | 3.82                        |
| 4   | <b>S12</b> (0.3)              | 3.17E-03                                       | 6.26                        |
| 5   | <b>S12</b> (0.8)              | 8.44E-03                                       | 4.12                        |
| 6   | <b>S12</b> (0.8) <sup>c</sup> | 8.44E-03                                       | 1.07                        |

<sup>a</sup> **Conditions:** 80°C, 5  $\mu\text{mol}$  TIBA as co-catalyst, 0.5 mol/L ethylene concentration, ethylene pressure: 92 psi, 1 hour polymerization run; reaction quenched with <sup>20</sup> CO<sub>2</sub>; <sup>b</sup> determined by XPS. <sup>c</sup> Repeated Run

**Table S2** PPR - Copolymerization using **S10** and **S12** with TIBA or EADC as co-catalyst<sup>d</sup>

| Run | Pro-Catalyst (mg) | Co-catalyst | Metal Content (mmol) <sup>b</sup> | Yield (g) | Activity (g/mmol.hr) | Final Ethylene uptake (psi) |
|-----|-------------------|-------------|-----------------------------------|-----------|----------------------|-----------------------------|
| 7   | <b>S10</b> (0.8)  | TIBA        | 8.44E-06                          | 0.0018    | 34                   | 2.14                        |
| 8   | <b>S10</b> (1.0)  | TIBA        | 1.06E-05                          | 0.0056    | 84                   | 4.58                        |
| 9   | <b>S10</b> (0.4)  | EADC        | 4.22E-06                          | 0.0106    | 396                  | 6.26                        |
| 10  | <b>S10</b> (0.8)  | EADC        | 8.44E-06                          | 0.0215    | 402                  | 12.21                       |
| 11  | <b>S10</b> (1.0)  | EADC        | 1.06E-05                          | 0.0171    | 256                  | 10.68                       |
| 12  | <b>S12</b> (0.4)  | TIBA        | 4.22E-06                          | 0.004     | 150                  | 4.88                        |
| 13  | <b>S12</b> (0.8)  | TIBA        | 8.44E-06                          | 0.0065    | 121                  | 4.12                        |
| 14  | <b>S12</b> (1.0)  | TIBA        | 1.06E-05                          | 0.0078    | 117                  | 5.65                        |
| 15  | <b>S12</b> (0.4)  | EADC        | 4.22E-06                          | 0.012     | 449                  | 5.95                        |
| 16  | <b>S12</b> (0.8)  | EADC        | 8.44E-06                          | 0.0229    | 428                  | 13.74                       |
| 17  | <b>S12</b> (1.0)  | EADC        | 1.06E-05                          | 0.0178    | 266                  | 14.35                       |

<sup>a</sup> **Conditions:** 80°C, 5  $\mu\text{mol}$  TIBA as co-catalyst, 0.5 mol/L ethylene concentration, ethylene pressure: 92 psi, 1 hour polymerization run; reaction quenched with <sup>25</sup> CO<sub>2</sub>; <sup>b</sup> determined by XPS; metal content was 0.0537% of bulk sample.

**Table S3** PPR - Copolymerization using **S10** or **S12** with co-catalyst EADC and ETA<sup>a</sup>.

| Run | Pro-Catalyst (mg)             | Metal Content (mmol) <sup>b</sup> | Yield (g) | Activity (g/mmol.hr) | Final Ethylene uptake (psi) | ETA:M Ratio |
|-----|-------------------------------|-----------------------------------|-----------|----------------------|-----------------------------|-------------|
| 18  | <b>S10</b> (0.3)              | 3.17E-06                          | 0.0054    | 269                  | 10.38                       | 1440        |
| 19  | <b>S10</b> (0.3) <sup>c</sup> | 3.17E-06                          | 0.0152    | 757                  | 16.03                       | 1440        |
| 20  | <b>S10</b> (0.8)              | 8.44E-06                          | 0.0017    | 32                   | 3.51                        | 1440        |
| 21  | <b>S10</b> (0.8) <sup>c</sup> | 8.44E-06                          | 0.0038    | 71                   | 5.04                        | 1440        |
| 22  | <b>S12</b> (0.3)              | 3.17E-06                          | 0.0288    | 1435                 | 18.77                       | 720         |
| 23  | <b>S12</b> (0.3)              | 3.17E-06                          | 0.004     | 199                  | 8.09                        | 1440        |
| 24  | <b>S12</b> (0.3) <sup>c</sup> | 3.17E-06                          | 0.0085    | 424                  | 7.94                        | 1440        |
| 25  | <b>S12</b> (0.3) <sup>c</sup> | 3.17E-06                          | 0.035     | 1744                 | 25.64                       | 1440        |
| 26  | <b>S12</b> (0.3) <sup>c</sup> | 3.17E-06                          | 0.0125    | 623                  | 11.14                       | 1440        |
| 27  | <b>S12</b> (0.8)              | 8.44E-06                          | 0.0086    | 161                  | 10.38                       | 1440        |
| 28  | <b>S12</b> (0.8) <sup>c</sup> | 8.44E-06                          | 0.0081    | 151                  | 8.70                        | 1440        |

<sup>a</sup> **Conditions:** 80°C, 5 μmol EADC as co-catalyst, 0.5 mol/L ethylene concentration, ethylene pressure: 92 psi, 1 hour polymerization run; ETA added as a solution in heptane; reaction quenched with CO<sub>2</sub>; <sup>b</sup> determined by XPS: metal content was 0.0537% of bulk sample; <sup>c</sup> repeated runs.
